# Supplementary material for: Differential Expression of RSK4 Transcript Isoforms in Cancer and Its Clinical Relevance
Source: MDPI journal article supplement (doi:10.3390/ijms232314569), 2022-11-23

Supp Table S1: Matching of GTEx and TCGA tissue samples

| GTEx_Tissue     | TCGA_Cancer types                                                                    | Abbreviations        | GTEx | TCGA |
|-----------------|--------------------------------------------------------------------------------------|----------------------|------|------|
| Bladder         | Bladder Urothelial Carcinoma                                                         | BLCA                 | 9    | 407  |
| Breast          | Breast Invasive Carcinoma                                                            | BRCA                 | 179  | 1099 |
| Cervix & Uterus | Cervical & Endocervical Cancer<br>Uterine Carcinosarcoma                             | CESC<br>UCS          | 88   | 363  |
| Brain           | Glioblastoma Multiforme<br>Brain Lower Grade Glioma                                  | GBM<br>LGG           | 1141 | 689  |
| Fallopian Tube  | Ovarian Serous<br>Cystadenocarcinoma                                                 | OV                   | 5    | 427  |
| Lung            | Lung Adenocarcinoma<br>Lung Squamous Cell Carcinoma                                  | LUAD<br>LUSC         | 288  | 1013 |
| Prostate        | Prostate Adenocarcinoma                                                              | PRAD                 | 100  | 496  |
| Testis          | Testicular Germ Cell Tumor                                                           | TGCT                 | 165  | 154  |
| Esophagus       | Esophageal Carcinoma                                                                 | ESCA                 | 653  | 182  |
| Pancreas        | Pancreatic Adenocarcinoma                                                            | PAAD                 | 167  | 179  |
| Kidney          | Kidney Papillary Cell Carcinoma<br>Kidney Clear Cell Carcinoma<br>Kidney Chromophobe | KIRP<br>KIRC<br>KICH | 28   | 886  |
| Liver           | Liver Hepatocellular Carcinoma                                                       | LIHC                 | 110  | 371  |
| Muscle          | Sarcoma                                                                              | SARC                 | 1189 | 349  |
| Colon           | Colon Adenocarcinoma                                                                 | COAD                 | 308  | 290  |
| Stomach         | Stomach Adenocarcinoma                                                               | STAD                 | 174  | 414  |
| Skin            | Skin Cutaneous Melanoma                                                              | SKCM                 | 556  | 469  |
| Thyroid         | Thyroid Carcinoma                                                                    | THCA                 | 279  | 512  |
| Blood           | Acute Myeloid Leukemia<br>Diffuse Large B-Cell Lymphoma                              | AML<br>DLBC          | 337  | 220  |
| Adrenal Gland   | Adrenocortical Cancer<br>Pheochromocytoma &<br>Paranganglioma                        | ACC<br>PCPG          | 128  | 259  |

**Supp Table S2: Outcomes of univariate and multivariate Cox proportional hazards ratio analysis for LGG, STAD, KIRC, CESC.**

| Brain Lower Grade Glioma (LGG)        |                     |              |                       |              |
|---------------------------------------|---------------------|--------------|-----------------------|--------------|
| Variables                             | Univariate analysis |              | Multivariate analysis |              |
|                                       | HR(95% CI)          | adj-p-value  | HR(95% CI)            | adj-p-value  |
| RSK4 isoform 1                        | 0.77 (0.71-0.84)    | 1.64e-08 *** | 0.763 (0.689-0.844)   | 1.49e-07 *** |
| Family history (Yes/No)               | 1.23 (0.84-1.79)    | 0.283        |                       |              |
| Gender (male vs female)               | 1.12 (0.79-1.58)    | 0.538        |                       |              |
| Age (>60 vs ≤ 60)                     | 5.02 (3.28-7.66)    | 8.3e-14 ***  | 4.91 (3.19-7.58)      | 5.75e-13 *** |
| Headache (Yes/No)                     | 0.859 (0.59-1.25)   | 0.427        |                       |              |
| Recurrence (Yes/No)                   | 2.71 (1.86-3.96)    | 2.28e-07 *** | 2.61 (1.78-3.80)      | 6.87e-07 *** |
| Stomach Adenocarcinoma (STAD)         |                     |              |                       |              |
| Variables                             | Univariate analysis |              | Multivariate analysis |              |
|                                       | HR(95% CI)          | adj-p-value  | HR(95% CI)            | adj-p-value  |
| RSK4 isoform 1                        | 1.08 (1.02-1.15)    | 1.89e-02 *   | 1.10 (1.03-1.18)      | 0.00339 **   |
| Gender (male vs female)               | 1.19 (0.849-1.67)   | 0.312        |                       |              |
| Age (>60 vs ≤ 60)                     | 1.66 (1.16-2.57)    | 0.00582 **   | 2.12 (1.47-3.07)      | 6.67e-05 *** |
| Stage.high (I&II vs III&IV)           | 1.85 (1.33-2.57)    | 0.000234 *** | 1.60 (1.14-2.25)      | 0.00692 **   |
| Recurrence (Yes/No)                   | 2.50 (1.82-3.44)    | 1.35e-08 *** | 2.33 (1.69-3.20)      | 1.89e-07 *** |
| Metastasis (Yes/No)                   | 2.32 (1.36-3.96)    | 0.00198 **   | 2.31 (1.32-4.02)      | 0.00322 **   |
| Kidney Clear Cell Carcinoma (KIRC)    |                     |              |                       |              |
| Variables                             | Univariate analysis |              | Multivariate analysis |              |
|                                       | HR(95% CI)          | adj-p-value  | HR(95% CI)            | adj-p-value  |
| RSK4 isoform 2                        | 0.93 (0.90-0.97)    | 6.81e-04 *** | 0.943 (0.906-0.981)   | 0.0038 **    |
| Gender (male vs female)               | 0.949 (0.696-1.29)  | 0.742        |                       |              |
| Age (>60 vs ≤ 60)                     | 1.83 (1.34-2.49)    | 0.000128 *** | 1.67 (1.22-2.27)      | 0.0012 **    |
| Stage.high (I&II vs III&IV)           | 3.74 (2.73-5.13)    | < 2e-16 ***  | 2.59 (1.78-3.76)      | 6.40e-07 *** |
| Recurrence (Yes/No)                   | 0.298 (0.110-0.805) | 0.017 *      | 0.168 (0.0617-0.458)  | 0.0005 ***   |
| Metastasis (Yes/No)                   | 4.32 (3.16-5.90)    | < 2e-16 ***  | 2.62 (1.81-3.79)      | 3.48e-07 *** |
| Cervical & Endocervical Cancer (CESC) |                     |              |                       |              |
| Variables                             | Univariate analysis |              | Multivariate analysis |              |
|                                       | HR(95% CI)          | adj-p-value  | HR(95% CI)            | adj-p-value  |
| RSK4 isoform 2                        | 1.23 (1.14-1.33)    | 2.26e-07 *** | 1.21 (1.12-1.32)      | 5.46e-06 *** |
| Age (>60 vs ≤ 60)                     | 1.83 (0.545-1.10)   | 0.0196 *     | 1.29 (0.747-2.21)     | 0.365        |
| Stage.high (I&II vs III&IV)           | 2.41 (1.49-3.93)    | 0.000371 *** | 1.93 (1.16-3.20)      | 0.0111 *     |
| Recurrence (Yes/No)                   | 4.70 (2.95-7.49)    | 6.77e-11 *** | 4.39 (2.74-7.03)      | 7.33e-10 *** |
| Metastasis (Yes/No)                   | 2.28 (0.83-6.29)    | 0.11         |                       |              |

Supp Fig S1: Kruskal Wallis tests – comparison of isoform 1 and 2 expression among both normal and tumour samples

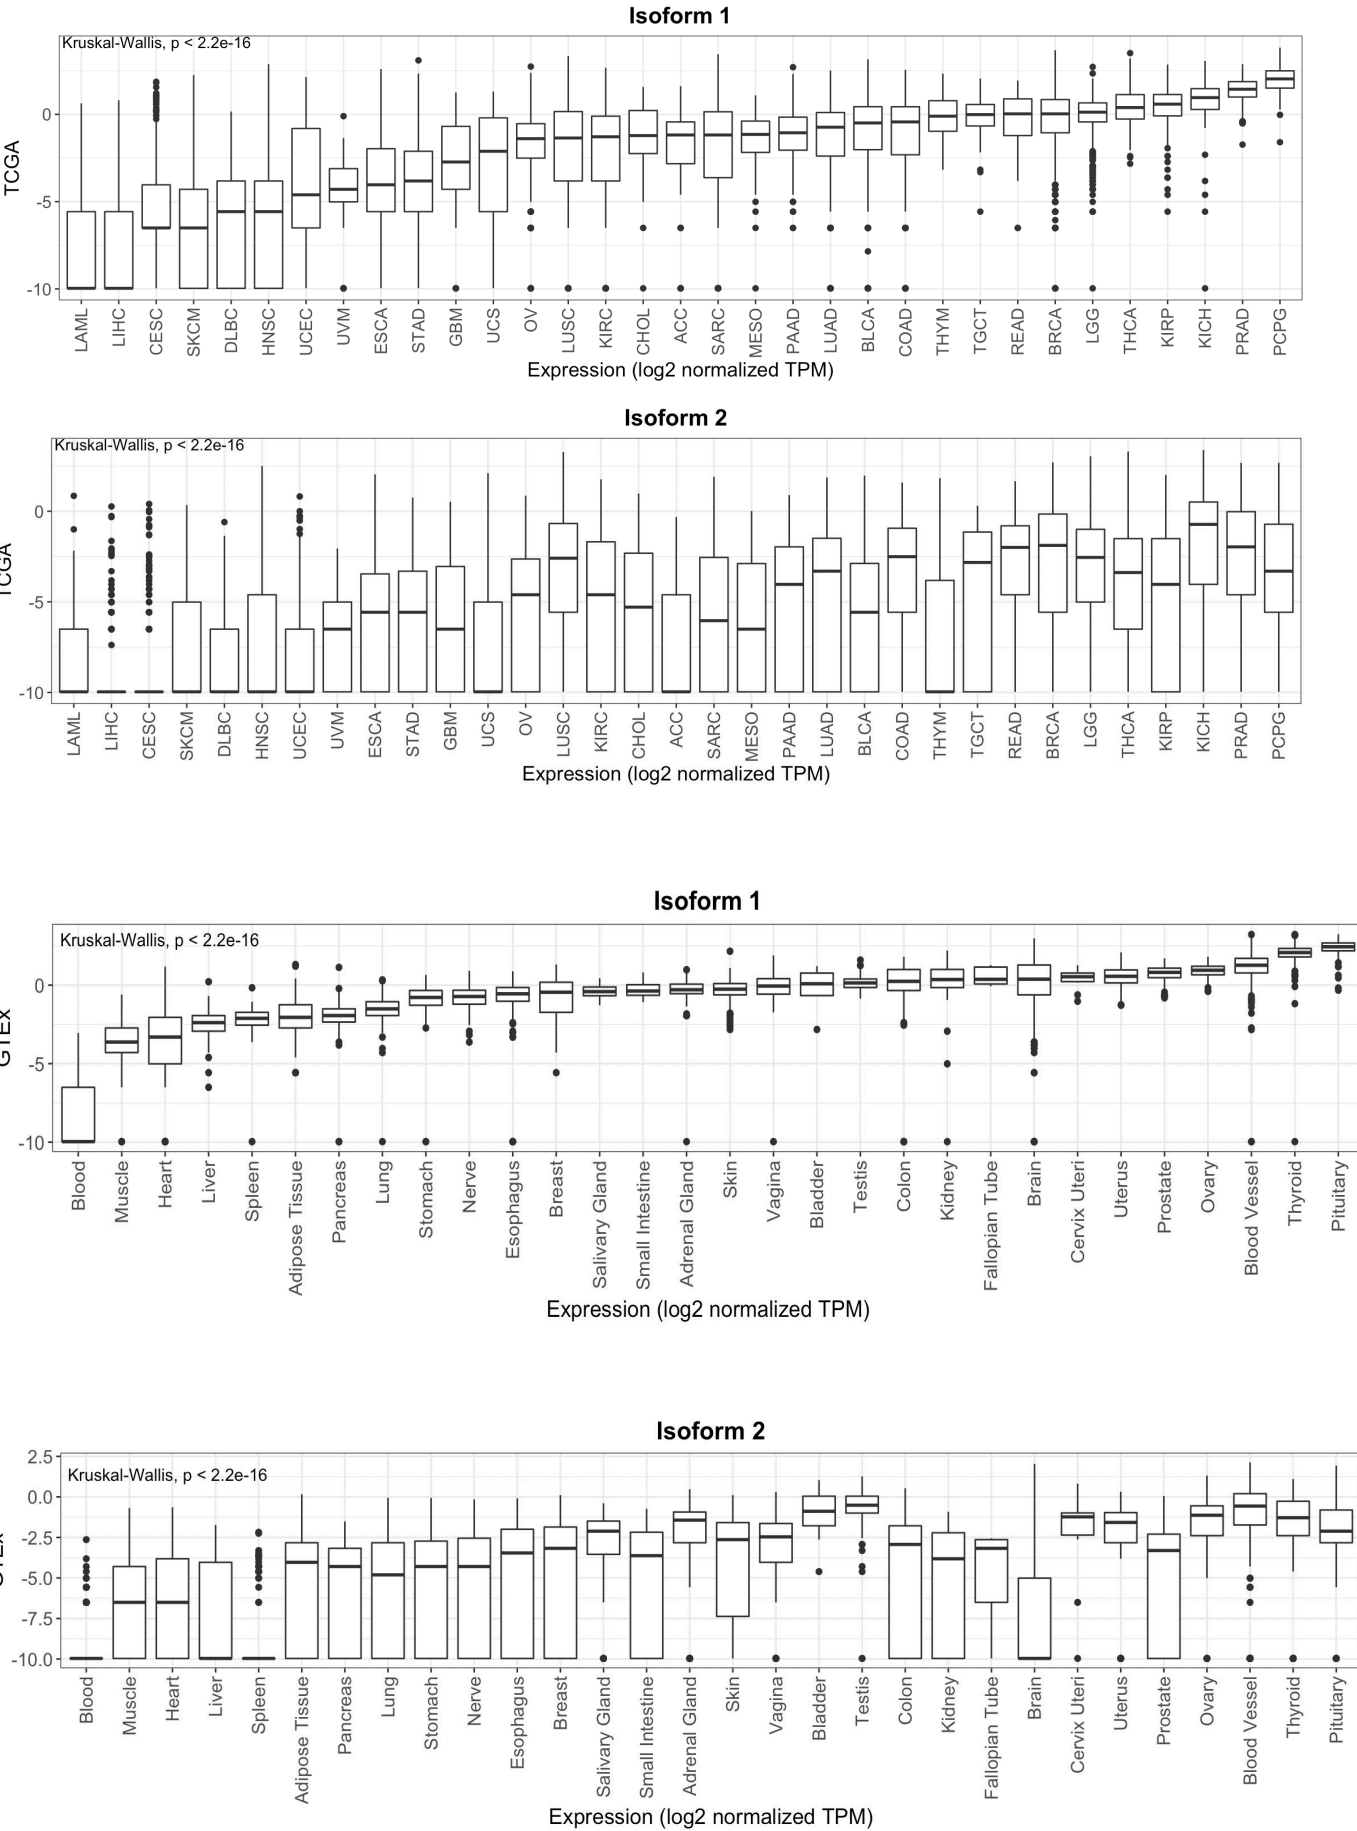

**Supp Fig S2: Proportion of infiltrating CAFs and CD4<sup>+</sup> T cells and overall survival of patients with LGG, KIRC and CESC.**

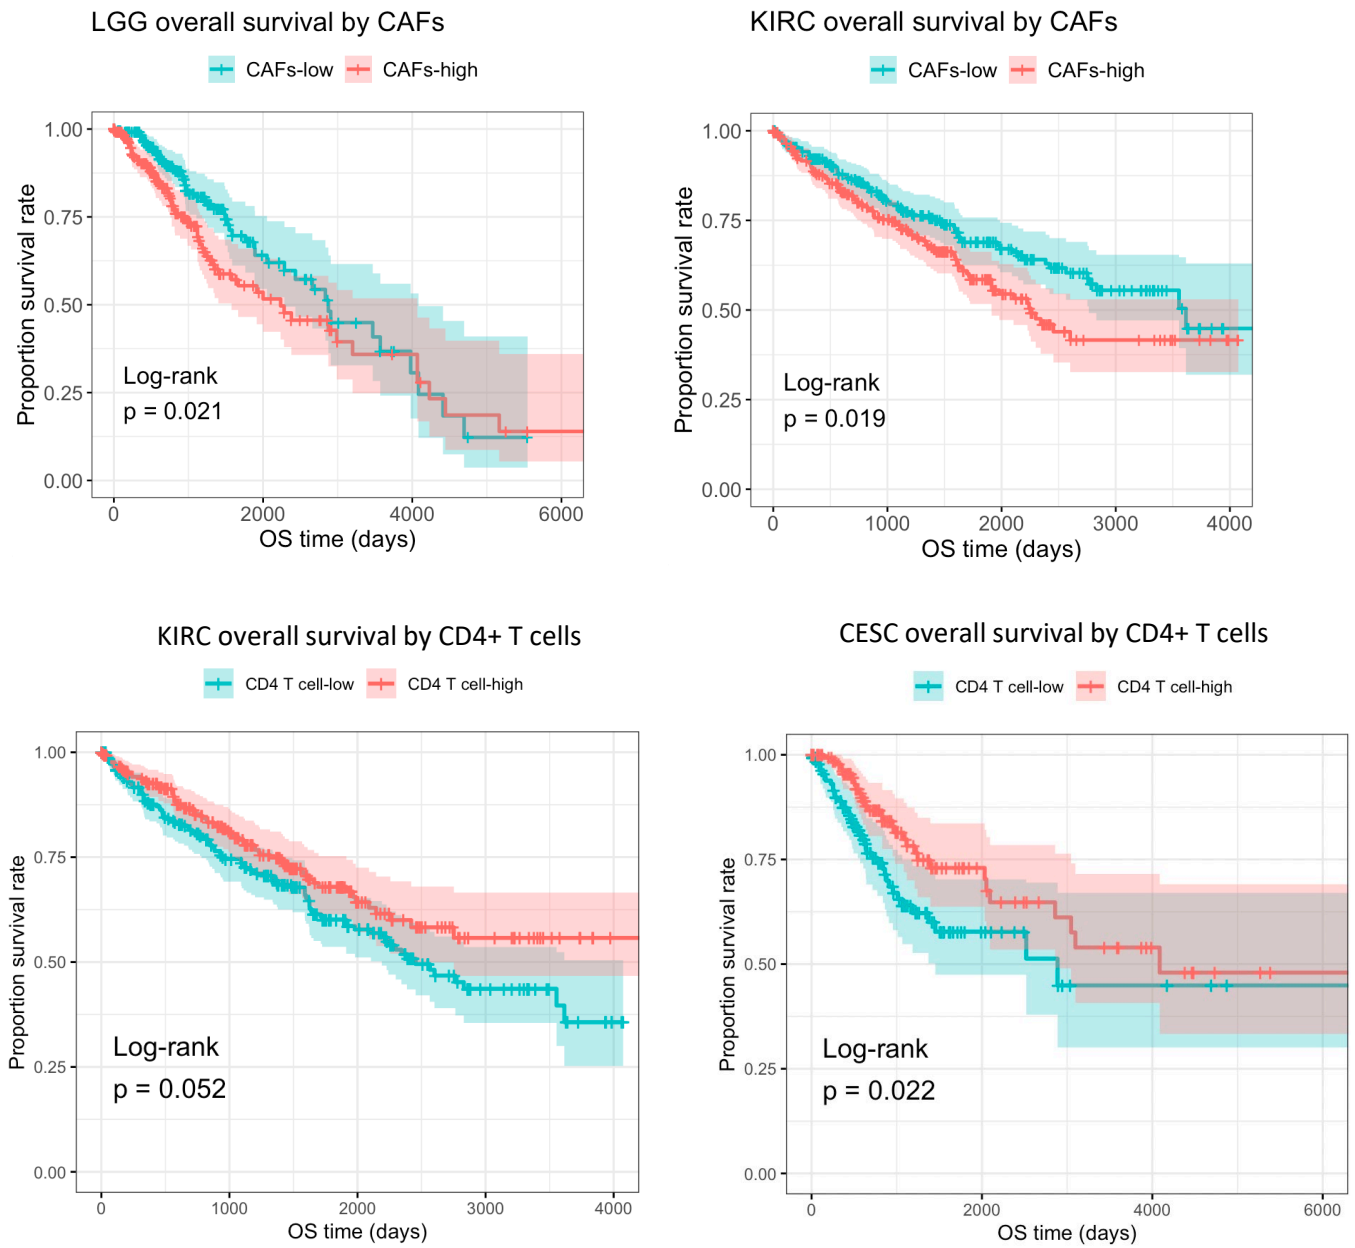

Supplement: s1 [file s1]
